# Supplementary material
Source: Springer Nature journal article supplement (https://www.springermedizin.de/resource/supplementary/12865_2008_234_MOESM5_ESM.pdf/9427568)

**A.**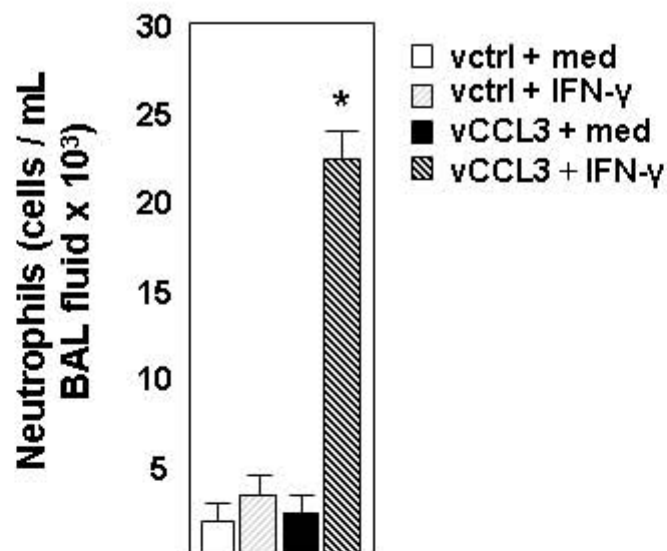**B.** vCCL3 + med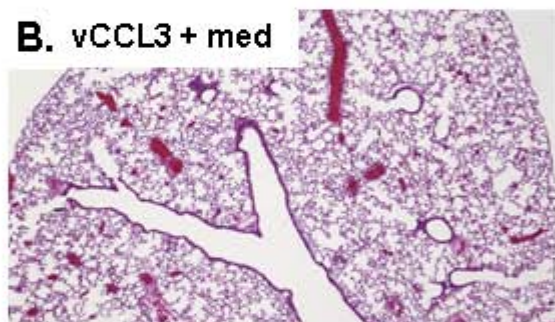**C.** vCCL3 + IFN $\gamma$ 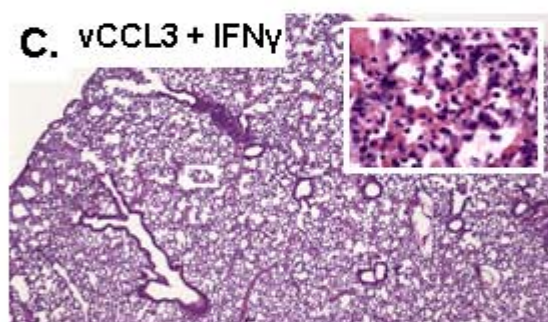**D.**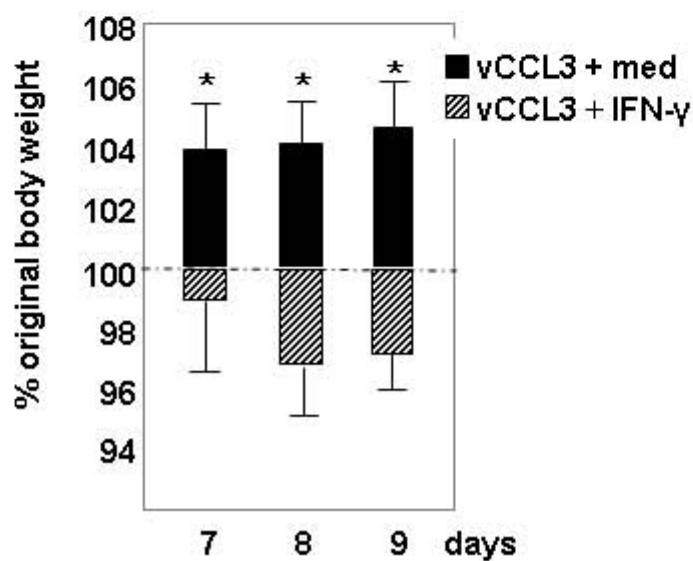

Supplement: MOESM5 [file 9427568]
